# Supplementary material
Source: PubMed Central journal article supplement (PMC27199)
Supplement: pnas_230294097v2_2.pdf [file pnas_230294097v2_2.pdf]

Flavones (B)

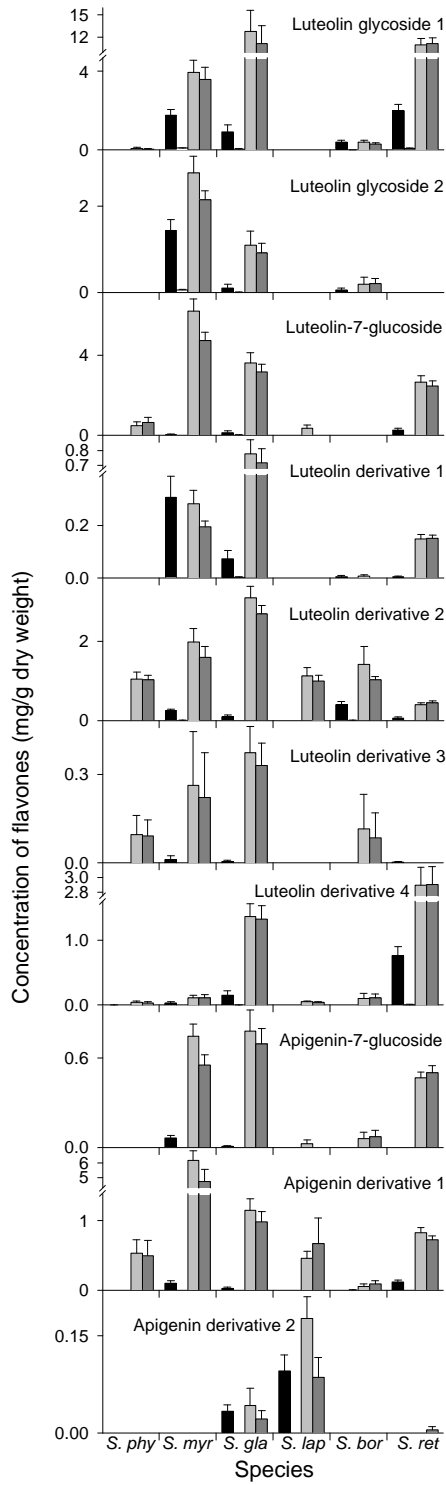

*S. phy* = *S. phyllicifolia*  
*S. myr* = *S. myrsinites*  
*S. gla* = *S. glauca*  
*S. lap* = *S. lapponum*  
*S. bor* = *S. borealis*  
*S. ret* = *S. reticulata*

Gall cortex  
 Gall interior  
 Galled leaf  
 Ungalled leaf

Flavonols (C)

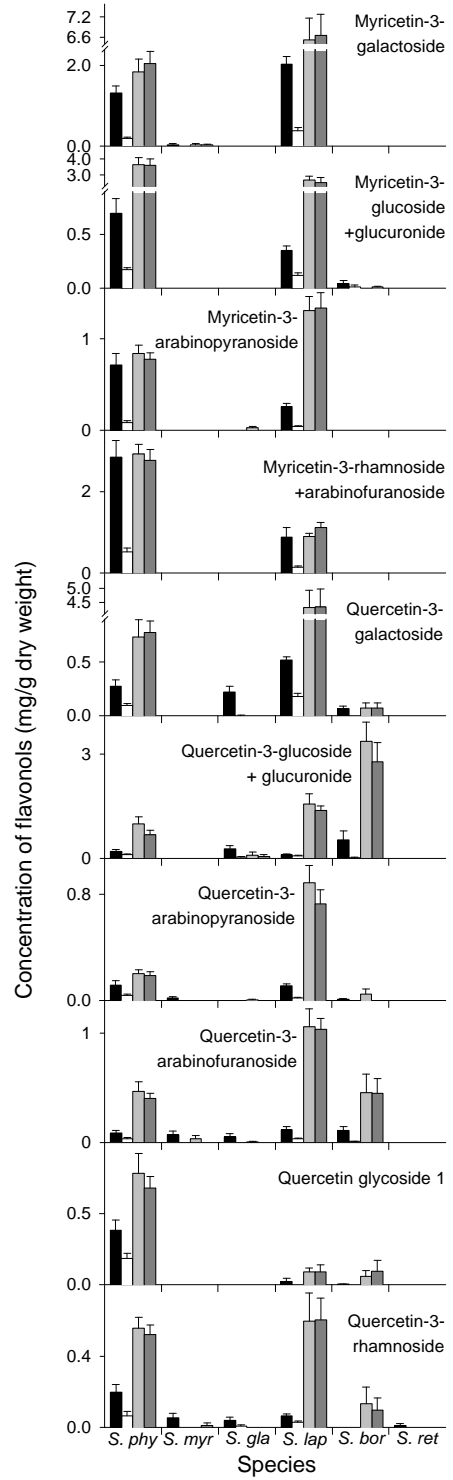

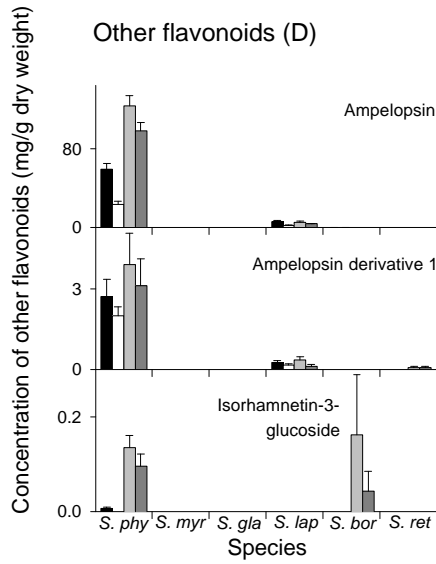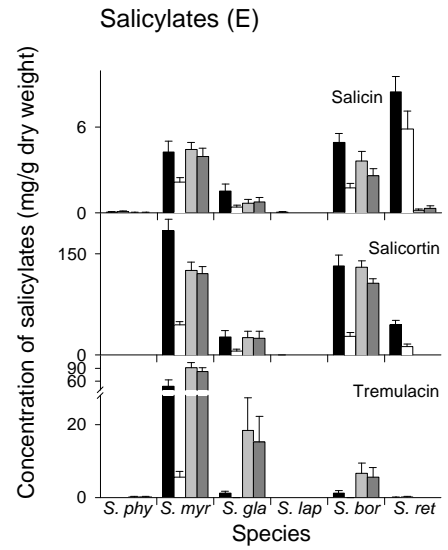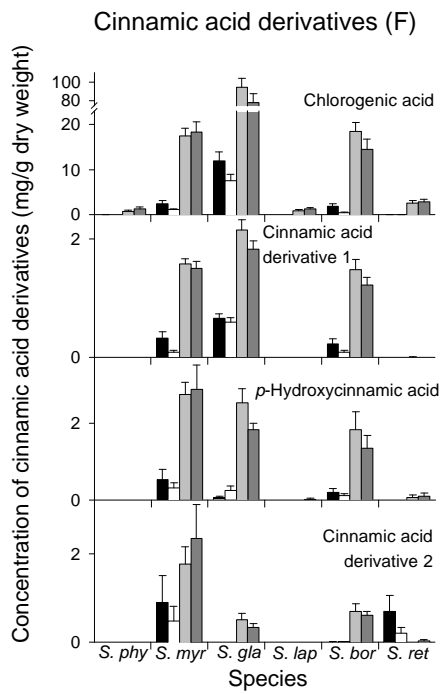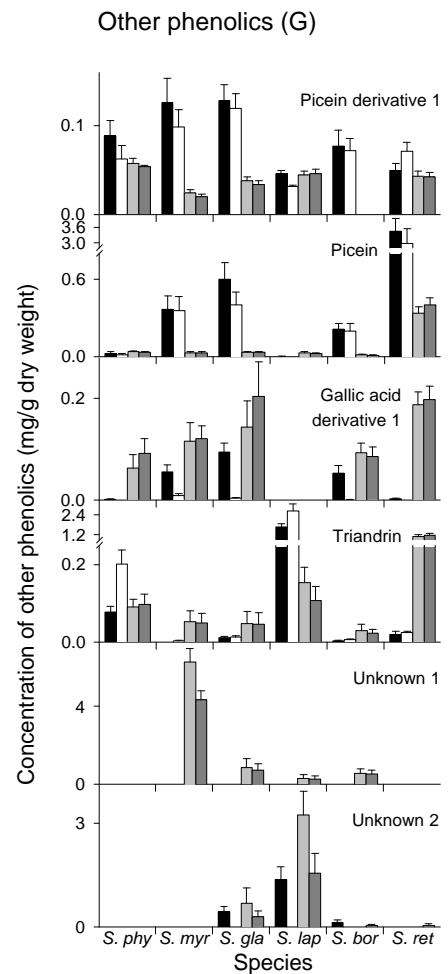

*S. phy* = *S. phyllicifolia*  
*S. myr* = *S. myrsinifolia*  
*S. gla* = *S. glauca*  
*S. lap* = *S. lapponum*  
*S. bor* = *S. borealis*  
*S. ret* = *S. reticulata*

Legend:  
 Gall cortex (black)  
 Gall interior (white)  
 Galled leaf (light grey)  
 Ungalled leaf (dark grey)
