# Supplementary material
Source: PubMed Central journal article supplement (PMC27199)

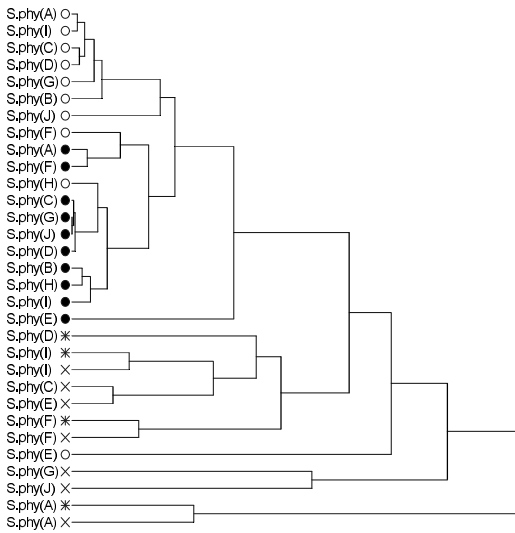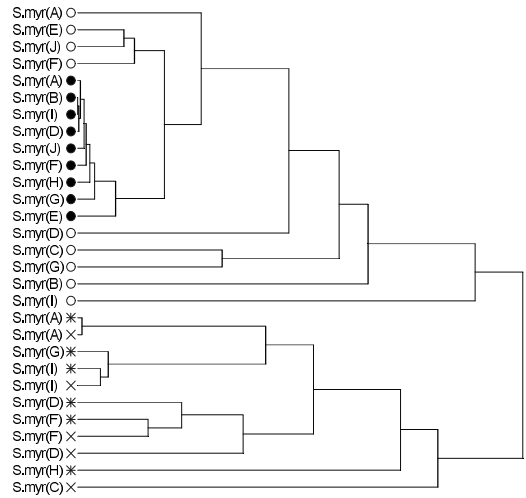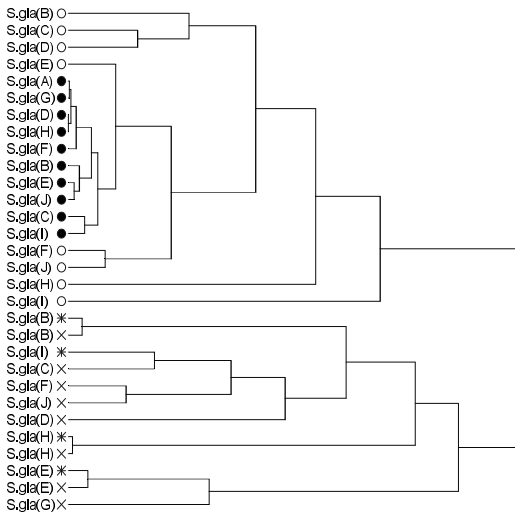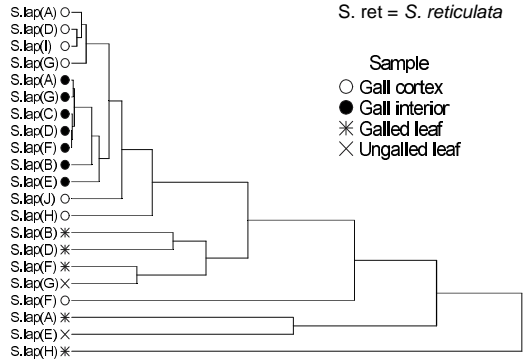

Species  
 S. phy = *S. phylicifolia*  
 S. myr = *S. myrsinifolia*  
 S. gla = *S. glauca*  
 S. lap = *S. lapponum*  
 S. bor = *S. borealis*  
 S. ret = *S. reticulata*

Sample  
 ○ Gall cortex  
 ● Gall interior  
 \* Galled leaf  
 x Ungalled leaf

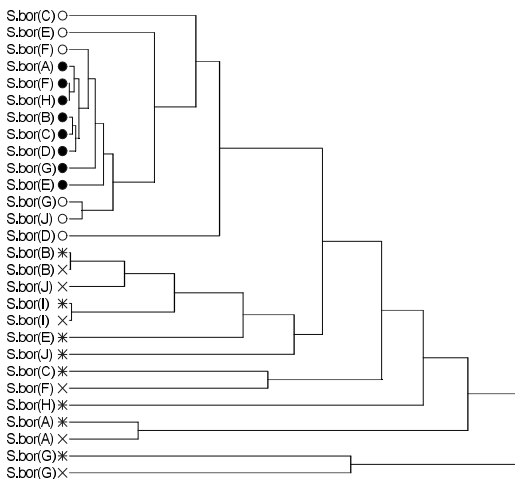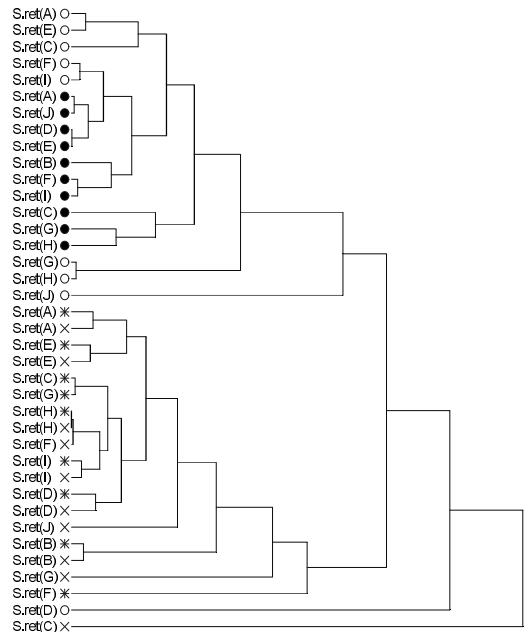

Supplement: pnas_230294097v2_5.pdf [file pnas_230294097v2_5.pdf]
